# Supplementary material for: Characterization of Arabidopsis CYP79C1 and CYP79C2 by Glucosinolate Pathway Engineering in Nicotiana benthamiana Shows Substrate Specificity Toward a Range of Aliphatic and Aromatic Amino Acids
Source: PubMed Central journal article supplement (PMC7033466; doi:10.3389/fpls.2020.00057), 2020-02-14
Supplement: DataSheet_2.pdf [file DataSheet_2.pdf]

## Supplementary tables for:

**Title:** Characterization of Arabidopsis CYP79C1 and CYP79C2 by Glucosinolate Pathway Engineering in *Nicotiana benthamiana* Shows Substrate Specificity Toward a Range of Aliphatic and Aromatic Amino Acids

**Authors:** Cuiwei Wang, Mads Møller Dissing, Niels Agerbirk, Christoph Crocoll and Barbara Ann Halkier

**Journal:** Frontiers in Plant Science

## Contents:

**Supplementary Table S1.** Primers in this study.

**Supplementary Table S2:** MRM transitions and response factors for quantification of dsGLSs.

**Supplementary Table S3.** The yield of GLSs produced with the aliphatic core pathway.

**Supplementary Table S4.** *P*-values (Student's *t*-test) used to compare the same type GLS yields between co-expression of *CYP79C1*, *CYP79C2* and no *CYP79* with the aliphatic core pathway.

**Supplementary Table S5.** The yield of GLSs produced with the aromatic core pathway.

**Supplementary Table S6.** *P*-values (Student's *t*-test) used to compare the same type GLS yields between co-expression of *CYP79C1*, *CYP79C2* and no *CYP79* with the aromatic core pathway.

**Supplementary Table S7.** The yield of GLSs produced with the chain elongation pathway and the aliphatic core pathway.

**Supplementary Table S8.** *P*-values (Student's *t*-test) used to compare the GLS yields between co-expression of *CYP79C1* and *CYP79C2* with the chain elongation pathway and the aliphatic core pathway.

**Supplementary Table S1.** Primers in this study.

| Primers             | Sequences 5'-3'                          |
|---------------------|------------------------------------------|
| CW172-CYP79C1-F     | GGCTTAAUATGGATTATTATCTGAATAATGTTATCTTCTC |
| CW173-CYP79C1-R     | GGTTTAAUTCAAGCTGGACCGGTCCAGAG            |
| CW174-CYP79C2-F     | GGCTTAAUATGACTATTATCACGAATCCATCC         |
| CW175-CYP79C2-R     | GGTTTAAUCTAGATCTGGATTTTCGGATAT           |
| CW176-Seq-F         | GAGTCGACCTGCAGGCAT                       |
| CW177-Seq-R         | GTTTTCCAGTCACGACGTT                      |
| CW404-AtCYP79F1     | GGCTTAAUATGATGAGCTTTACCACATCA            |
| CW405-AtCYP79F1     | GGTTTAAUTTAAGGACGGAACCTTTGGAT            |
| CW368-CYP83A1-F     | GGCTTAAUATGGAAGATATCATCATCGGCGT          |
| CW369-CYP83A1-R     | GGTTTAAUCTAATACTTGTTCACTTTCTCTGG         |
| CW370-CYP83A1-seq-R | CTTAGGATCAAGCGTCTCATT                    |
| CW365 -CYP83B1-F    | GGCTTAAUATGGATCTCTTATTGATTATAGC          |
| CW366 -CYP83B1-R    | GGTTTAAUTCAGATGTGTTTCGTTGGT              |
| CW367-CYP83B1-seq-R | TTAGGGTCAAGAGTCTCGT                      |
| CW373-CYP79D2-F     | GGCTTAAUATGGCCATGAACGTCTCCA              |
| CW374-CYP79D2-R     | GGTTTAAUTTAATTCAAGGTGAAGTGGGGT           |
| CW376-CYP79D2-seq-R | CGTAATGCCTTGCCGCAAT                      |
| CW371-GGP1-F        | GGCTTAAUATGGTGGAGCAAAAGAGA               |
| CW372-GGP1-R        | GGTTTAAUCTAGTTAGTTGGAACCTCTGCCT          |

The primers containing uracil (U) were used for USER cloning and the primers labelled 'seq' were used for sequencing.

**Supplementary Table S2:** MRM transitions for quantification of selected dsGLSs.

| Analyte<br>[M+H] <sup>+</sup>       | Retention<br>time [min] | Q1<br>[m/z] | Q3<br>[m/z]         | CE<br>[eV] |
|-------------------------------------|-------------------------|-------------|---------------------|------------|
| ds1ME GLS                           | 2.02                    | 282.1       | 120.0 <sup>Qt</sup> | 6          |
|                                     |                         | 282.1       | 86.2                | 19         |
| ds2MP GLS                           | 2.36                    | 296.1       | 134.1 <sup>Qt</sup> | 7          |
|                                     |                         | 296.1       | 100.1               | 19         |
| ds1MP GLS                           | 2.50                    | 296.1       | 134.1 <sup>Qt</sup> | 7          |
|                                     |                         | 296.1       | 100.1               | 19         |
| dsBGLS                              | 1.94                    | 330.0       | 168.0 <sup>Qt</sup> | 6          |
|                                     |                         | 330.0       | 91.0                | 23         |
| ds3MB GLS                           | 2.94                    | 310.0       | 148.0 <sup>Qt</sup> | 7          |
|                                     |                         | 310.0       | 114.0               | 19         |
| ds4MP GLS                           | 3.46                    | 324.0       | 162.0 <sup>Qt</sup> | 7          |
|                                     |                         | 324.0       | 128.0               | 19         |
| ds allyl GLS<br>(Internal standard) | 1.55                    | 280.0       | 118.0 <sup>Qt</sup> | 5          |
|                                     |                         | 280.0       | 145.0               | 10         |
|                                     |                         | 280.0       | 74.2                | 8          |

CE = collision energy; Q = quadrupole; Qt = product ion used for quantification.

**Supplementary Table S3.** The yield of GLSs produced with the aliphatic core pathway.

|             | Yield of GLSs (nmol/g fw) |             |             |             |      |           |
|-------------|---------------------------|-------------|-------------|-------------|------|-----------|
|             | 1ME                       | 2MP         | 1MP         | BGLS        | pOHB | I3M       |
| CYP79C2     | n.d.                      | 34.67       | 1.00        | 61.40       | n.d. | 0.21      |
|             | n.d.                      | 56.48       | 2.44        | 105.65      | n.d. | 0.27      |
|             | n.d.                      | 28.59       | 1.09        | 61.20       | n.d. | 0.09      |
|             | n.d.                      | 4.49        | 0.21        | 29.30       | n.d. | n.d.      |
|             | n.d.                      | 42.73       | 1.72        | 84.02       | n.d. | n.d.      |
|             | n.d.                      | 56.30       | 1.70        | 78.23       | n.d. | 0.13      |
|             | n.d.                      | 6.50        | 0.25        | 31.05       | n.d. | 0.13      |
|             | n.d.                      | 31.42       | 0.96        | 100.71      | n.d. | n.d.      |
|             | n.d.                      | 51.16       | 1.54        | 134.13      | n.d. | 0.15      |
| Mean±stddev | -                         | 34.71±19.47 | 1.21±0.72   | 76.19±34.59 | -    | 0.16±0.07 |
| CYP79C1     | 0.16                      | 0.36        | 0.17        | 2.20        | n.d. | n.d.      |
|             | 0.12                      | 0.59        | 0.15        | 2.74        | n.d. | n.d.      |
|             | 0.59                      | 0.40        | 0.33        | 2.33        | n.d. | n.d.      |
|             | n.d.                      | n.d.        | n.d.        | 0.52        | n.d. | n.d.      |
|             | 0.11                      | 0.30        | 0.10        | 1.36        | n.d. | n.d.      |
|             | 0.20                      | 0.21        | 0.16        | 1.23        | n.d. | n.d.      |
|             | 0.11                      | 0.12        | 0.13        | 1.03        | n.d. | n.d.      |
|             | n.d.                      | 0.93        | n.d.        | 1.81        | n.d. | n.d.      |
|             | n.d.                      | 1.64        | 0.31        | 4.41        | n.d. | n.d.      |
| Mean±stddev | 0.14±0.19                 | 0.57±0.50   | 0.15±0.11   | 1.96±1.15   | -    | -         |
| CYP79D2     | 36.05                     | 0.24        | 16.90       | n.d.        | n.d. | n.d.      |
|             | 68.93                     | 1.47        | 39.40       | n.d.        | n.d. | n.d.      |
|             | 72.93                     | 0.62        | 29.70       | n.d.        | n.d. | n.d.      |
|             | 51.83                     | 1.04        | 30.14       | n.d.        | n.d. | n.d.      |
|             | 17.78                     | 0.38        | 11.59       | n.d.        | n.d. | n.d.      |
|             | 54.31                     | 0.77        | 31.96       | n.d.        | n.d. | n.d.      |
|             | 31.47                     | 0.47        | 19.54       | n.d.        | n.d. | n.d.      |
|             | 64.54                     | 1.59        | 38.91       | n.d.        | n.d. | n.d.      |
|             | 87.00                     | 1.26        | 36.40       | n.d.        | n.d. | n.d.      |
| Mean±stddev | 53.87±22.16               | 0.87±0.49   | 28.28±10.04 | -           | -    | -         |
| No CYP79    | n.d.                      | n.d.        | n.d.        | n.d.        | n.d. | n.d.      |
|             | n.d.                      | n.d.        | n.d.        | 0.90        | n.d. | n.d.      |
|             | n.d.                      | n.d.        | n.d.        | 0.69        | n.d. | n.d.      |
|             | n.d.                      | n.d.        | n.d.        | 0.35        | n.d. | n.d.      |
|             | n.d.                      | n.d.        | n.d.        | 0.48        | n.d. | n.d.      |
|             | n.d.                      | n.d.        | n.d.        | 0.30        | n.d. | n.d.      |
|             | n.d.                      | n.d.        | n.d.        | 1.25        | n.d. | n.d.      |
|             | n.d.                      | n.d.        | n.d.        | 0.83        | n.d. | n.d.      |
|             | n.d.                      | n.d.        | n.d.        | 1.25        | n.d. | n.d.      |
| Mean±stddev | -                         | -           | -           | 0.76±0.37   | -    | -         |

n.d. = not detected, In some cases the detection of very low levels of dsGLSs by LC-MS was close to the detection limit. However, the presence of all presented dsGLSs was confirmed by repeated analysis by LC-MS.

**Supplementary Table S5.** The yield of GLSs produced with the aromatic core pathway.

|             | Yield of GLSs (nmol/g fw) |              |           |               |           |           |
|-------------|---------------------------|--------------|-----------|---------------|-----------|-----------|
|             | 1ME                       | 2MP          | 1MP       | BGLS          | pOHB      | I3M       |
| CYP79C2     | n.d.                      | 93.62        | 1.77      | 136.87        | 0.62      | 0.13      |
|             | n.d.                      | 175.87       | 3.83      | 183.49        | 1.17      | 0.22      |
|             | n.d.                      | 101.93       | 2.06      | 191.37        | 0.77      | 0.20      |
|             | n.d.                      | 79.34        | 2.33      | 83.46         | 0.64      | 0.14      |
|             | n.d.                      | 246.58       | 5.15      | 250.77        | 1.72      | 0.31      |
|             | n.d.                      | 328.72       | n.d.      | 179.17        | n.d.      | 0.40      |
|             | n.d.                      | 145.24       | 2.32      | 150.16        | 0.84      | 0.22      |
|             | n.d.                      | 295.02       | 6.52      | 206.90        | 1.03      | 0.33      |
|             | n.d.                      | 154.91       | 3.96      | 139.21        | 0.95      | 0.19      |
| Mean±stddev | -                         | 180.14±90.36 | 3.49±1.69 | 169.04±48.13  | 0.97±0.36 | 0.24±0.09 |
| CYP79C1     | n.d.                      | 4.11         | 0.82      | 4.90          | n.d.      | n.d.      |
|             | n.d.                      | 14.93        | 1.47      | 3.01          | n.d.      | n.d.      |
|             | n.d.                      | 6.99         | 1.17      | 2.50          | n.d.      | n.d.      |
|             | n.d.                      | 2.38         | 0.48      | 2.45          | n.d.      | n.d.      |
|             | n.d.                      | 10.08        | 1.33      | 2.95          | n.d.      | n.d.      |
|             | n.d.                      | 17.38        | 1.51      | 4.84          | n.d.      | n.d.      |
|             | n.d.                      | 2.33         | 0.28      | 2.79          | n.d.      | n.d.      |
|             | n.d.                      | 3.83         | 0.84      | 3.11          | n.d.      | n.d.      |
|             | n.d.                      | 5.64         | 1.07      | 2.80          | n.d.      | n.d.      |
| Mean±stddev | -                         | 7.52±5.49    | 1.00±0.43 | 3.26±0.94     | -         | -         |
| CYP79A2     | n.d.                      | n.d.         | n.d.      | 231.35        | 0.18      | n.d.      |
|             | n.d.                      | n.d.         | n.d.      | 651.49        | 0.66      | n.d.      |
|             | n.d.                      | n.d.         | n.d.      | 321.57        | 1.11      | n.d.      |
|             | n.d.                      | n.d.         | n.d.      | 346.06        | 0.31      | n.d.      |
|             | n.d.                      | n.d.         | n.d.      | 393.63        | 0.57      | n.d.      |
|             | n.d.                      | n.d.         | n.d.      | 727.56        | 1.47      | n.d.      |
|             | n.d.                      | n.d.         | n.d.      | 256.81        | 0.32      | n.d.      |
|             | n.d.                      | n.d.         | n.d.      | 615.04        | 1.40      | n.d.      |
|             | n.d.                      | n.d.         | n.d.      | 773.88        | 0.87      | n.d.      |
| Mean±stddev | -                         | -            | -         | 479.71±211.37 | 0.77±0.48 | -         |
| No CYP79    | n.d.                      | 0.86         | n.d.      | 1.31          | n.d.      | n.d.      |
|             | n.d.                      | 0.52         | n.d.      | 0.95          | n.d.      | n.d.      |
|             | n.d.                      | 0.29         | n.d.      | 0.93          | n.d.      | n.d.      |
|             | n.d.                      | 0.20         | n.d.      | 0.79          | n.d.      | n.d.      |
|             | n.d.                      | 0.81         | n.d.      | 1.34          | n.d.      | n.d.      |
|             | n.d.                      | 0.74         | n.d.      | 0.90          | n.d.      | n.d.      |
|             | n.d.                      | 1.04         | n.d.      | 2.08          | n.d.      | n.d.      |
|             | n.d.                      | 0.83         | n.d.      | 1.53          | n.d.      | n.d.      |
|             | n.d.                      | 1.08         | n.d.      | 1.25          | n.d.      | n.d.      |
| Mean±stddev | -                         | 0.71±0.31    | -         | 1.23±0.40     | -         | -         |

n.d. = not detected In some cases the detection of very low levels of dsGLS by LC-MS was close to the detection limit. However, the presence of all presented dsGLSs was confirmed by repeated analysis by LC-MS.

**Supplementary Table S7.** The yield of GLSs produced with the chain elongation pathway and the aliphatic core pathway.

|                               | Yield of chain-elongated GLSs (nmol/g fw) |           |           |             |             |           |             |
|-------------------------------|-------------------------------------------|-----------|-----------|-------------|-------------|-----------|-------------|
|                               | 2MP                                       | 1MP       | 3MB       | 4MP         | 3MTP        | 4MTB      | 4MSB        |
| CYP79C2                       | 1.13                                      | 0.00      | n.d.      | n.d.        | n.d.        | n.d.      | n.d.        |
|                               | 0.88                                      | 0.00      | n.d.      | n.d.        | n.d.        | n.d.      | n.d.        |
|                               | 7.30                                      | 0.53      | 1.83      | n.d.        | n.d.        | n.d.      | n.d.        |
|                               | 4.00                                      | 0.38      | 1.94      | 0.45        | n.d.        | n.d.      | n.d.        |
|                               | 10.10                                     | 0.70      | 3.75      | 1.25        | n.d.        | 0.38      | n.d.        |
|                               | 3.35                                      | 0.00      | 1.69      | n.d.        | n.d.        | n.d.      | n.d.        |
|                               | 3.82                                      | 0.00      | 1.43      | 0.53        | n.d.        | n.d.      | n.d.        |
|                               | 1.92                                      | 0.00      | 1.04      | n.d.        | n.d.        | n.d.      | n.d.        |
|                               | 8.06                                      | 0.52      | 2.71      | n.d.        | n.d.        | n.d.      | n.d.        |
|                               | 4.00                                      | 0.00      | 2.42      | n.d.        | n.d.        | n.d.      | n.d.        |
|                               | 10.06                                     | 0.46      | 3.76      | 0.96        | n.d.        | n.d.      | 0.87        |
|                               | 13.48                                     | 1.22      | 4.45      | 2.22        | n.d.        | 0.79      | n.d.        |
|                               | Mean±stddev                               | 5.68±4.05 | 0.32±0.39 | 2.08±1.42   | 0.45±0.70   | -         | 0.10±0.24   |
| CYP79C1                       | n.d.                                      | n.d.      | n.d.      | 1.11        | n.d.        | 3.26      | n.d.        |
|                               | n.d.                                      | n.d.      | n.d.      | 1.67        | n.d.        | 1.60      | n.d.        |
|                               | n.d.                                      | n.d.      | n.d.      | 2.35        | n.d.        | 6.43      | n.d.        |
|                               | n.d.                                      | n.d.      | n.d.      | 2.06        | n.d.        | 5.86      | n.d.        |
|                               | n.d.                                      | n.d.      | n.d.      | 1.86        | n.d.        | 4.13      | n.d.        |
|                               | n.d.                                      | n.d.      | n.d.      | 1.56        | n.d.        | 1.95      | n.d.        |
|                               | n.d.                                      | n.d.      | n.d.      | 3.55        | n.d.        | 2.82      | n.d.        |
|                               | n.d.                                      | n.d.      | n.d.      | 2.40        | n.d.        | 5.14      | n.d.        |
|                               | n.d.                                      | n.d.      | n.d.      | 1.08        | n.d.        | 3.91      | n.d.        |
|                               | n.d.                                      | n.d.      | n.d.      | 1.13        | n.d.        | 2.51      | n.d.        |
|                               | n.d.                                      | n.d.      | n.d.      | 1.41        | n.d.        | 4.63      | n.d.        |
|                               | n.d.                                      | n.d.      | n.d.      | 0.96        | n.d.        | 1.66      | n.d.        |
|                               | Mean±stddev                               | -         | -         | -           | 1.76±0.75   | -         | 3.66±1.63   |
| CYP79F1                       | n.d.                                      | n.d.      | 33.26     | 74.66       | 11.02       | 42.87     | 2.08        |
|                               | n.d.                                      | n.d.      | 31.27     | 56.69       | 8.83        | 23.71     | 1.31        |
|                               | n.d.                                      | n.d.      | 73.74     | 129.75      | 7.50        | 21.87     | 1.36        |
|                               | n.d.                                      | n.d.      | 55.78     | 101.79      | 7.50        | 32.63     | 1.69        |
|                               | n.d.                                      | n.d.      | 69.63     | 138.47      | 13.22       | 52.21     | 2.33        |
|                               | n.d.                                      | n.d.      | 61.02     | 122.19      | 11.10       | 38.34     | 2.04        |
|                               | n.d.                                      | n.d.      | 48.16     | 89.70       | 11.59       | 49.78     | 2.27        |
|                               | n.d.                                      | n.d.      | 48.57     | 113.56      | 8.37        | 29.54     | 1.65        |
|                               | n.d.                                      | n.d.      | 64.40     | 97.47       | 9.64        | 28.72     | 1.67        |
|                               | n.d.                                      | n.d.      | 26.63     | 45.79       | 6.57        | 16.22     | 0.87        |
|                               | n.d.                                      | n.d.      | 50.87     | 109.35      | 4.10        | 10.62     | 0.94        |
|                               | n.d.                                      | n.d.      | 47.55     | 116.65      | 15.27       | 49.97     | 2.50        |
|                               | Mean±stddev                               | -         | -         | 50.90±15.05 | 99.67±28.57 | 9.56±3.07 | 33.04±13.78 |
| Negative control              | n.d.                                      | n.d.      | n.d.      | n.d.        | n.d.        | n.d.      | n.d.        |
| Only chain elongation pathway | n.d.                                      | n.d.      | n.d.      | n.d.        | n.d.        | n.d.      | n.d.        |
|                               | n.d.                                      | n.d.      | n.d.      | n.d.        | n.d.        | n.d.      | n.d.        |
|                               | n.d.                                      | n.d.      | n.d.      | n.d.        | n.d.        | n.d.      | n.d.        |
|                               | n.d.                                      | n.d.      | n.d.      | n.d.        | n.d.        | n.d.      | n.d.        |
|                               | n.d.                                      | n.d.      | n.d.      | n.d.        | n.d.        | n.d.      | n.d.        |
|                               | n.d.                                      | n.d.      | n.d.      | n.d.        | n.d.        | n.d.      | n.d.        |
|                               | n.d.                                      | n.d.      | n.d.      | n.d.        | n.d.        | n.d.      | n.d.        |
|                               | n.d.                                      | n.d.      | n.d.      | n.d.        | n.d.        | n.d.      | n.d.        |
|                               | n.d.                                      | n.d.      | n.d.      | n.d.        | n.d.        | n.d.      | n.d.        |
|                               | n.d.                                      | n.d.      | n.d.      | n.d.        | n.d.        | n.d.      | n.d.        |
|                               | n.d.                                      | n.d.      | n.d.      | n.d.        | n.d.        | n.d.      | n.d.        |
|                               | n.d.                                      | n.d.      | n.d.      | n.d.        | n.d.        | n.d.      | n.d.        |
|                               | Mean ±stddev                              | -         | -         | -           | -           | -         | -           |

n.d. = not detected. No other GLSs were detected, including BGLS, pOHB and I3M, In some cases the detection of very low levels of dsGLS by LC-MS was close to the detection limit. However, the presence of all presented dsGLSs was confirmed by repeated analysis by LC-MS.

**Supplementary Table S4.** *P*-values (Student's *t*-test) used to compare the same type GLS yields between co-expression of *CYP79C1*, *CYP79C2* and no *CYP79* with the aliphatic core pathway.

|                 | <i>P</i> -values (Student's <i>t</i> -test) for comparison of GLS yields by expression of aliphatic core structure pathway |                |                |                |                |                |                |                |                |                |
|-----------------|----------------------------------------------------------------------------------------------------------------------------|----------------|----------------|----------------|----------------|----------------|----------------|----------------|----------------|----------------|
|                 | 1ME                                                                                                                        |                | 2MP            |                | 1MP            |                | BGLS           |                | I3M            |                |
|                 | <i>CYP79C2</i>                                                                                                             | <i>CYP79C1</i> | <i>CYP79C2</i> | <i>CYP79C1</i> | <i>CYP79C2</i> | <i>CYP79C1</i> | <i>CYP79C2</i> | <i>CYP79C1</i> | <i>CYP79C2</i> | <i>CYP79C1</i> |
| No <i>CYP79</i> | -                                                                                                                          | 0.05           | < 0.001        | 0.01           | < 0.001        | < 0.001        | < 0.001        | 0.01           | 0.01           | -              |

**Supplementary Table S6.** *P*-values (Student's *t*-test) used to compare the same type GLS yields between co-expression of *CYP79C1*, *CYP79C2* and no *CYP79* with the aromatic core pathway.

|                 | <i>P</i> -values (Student's <i>t</i> -test) for comparison of GLS yields by expression of aromatic core structure pathway |                |                |                |                |                |                |                |                |                |
|-----------------|---------------------------------------------------------------------------------------------------------------------------|----------------|----------------|----------------|----------------|----------------|----------------|----------------|----------------|----------------|
|                 | 2MP                                                                                                                       |                | 1MP            |                | BGLS           |                | pOHB           |                | I3M            |                |
|                 | <i>CYP79C2</i>                                                                                                            | <i>CYP79C1</i> | <i>CYP79C2</i> | <i>CYP79C1</i> | <i>CYP79C2</i> | <i>CYP79C1</i> | <i>CYP79C2</i> | <i>CYP79C1</i> | <i>CYP79C2</i> | <i>CYP79C1</i> |
| No <i>CYP79</i> | < 0.001                                                                                                                   | 0.01           | < 0.001        | < 0.001        | < 0.001        | < 0.001        | < 0.001        | -              | < 0.001        | -              |

**Supplementary Table S8.** *P*-values (Student's *t*-test) used to compare the GLS yields between co-expression of *CYP79C1* and *CYP79C2* with the chain elongation pathway and the aliphatic core pathway.

|                  | <i>P</i> -values (Student's <i>t</i> -test) for comparison of GLS yields between expression of <i>CYP79C1</i> or <i>CYP79C2</i> with the chain elongation and aliphatic core pathways |      |         |         |      |         |      |
|------------------|---------------------------------------------------------------------------------------------------------------------------------------------------------------------------------------|------|---------|---------|------|---------|------|
|                  | 2MP                                                                                                                                                                                   | 1MP  | 3MB     | 4MP     | 3MTP | 4MTB    | 4MSB |
| <i>P</i> -values | < 0.001                                                                                                                                                                               | 0.02 | < 0.001 | < 0.001 | -    | < 0.001 | 0.34 |
